# Supplementary material
Source: Elsevier journal article supplement (https://www.sciencedirect.com/science/article/pii/S0211699520300801)
Supplement: mmc1 [file S0211699520300801:mmc1.doc]

| N Biopsia | N cilindros | N glomérulos | Gomérulos esclerosados | Microcopia Óptica | IF | ME | Diagnóstico |
| --- | --- | --- | --- | --- | --- | --- | --- |
| 1 | 1 | 0 | NA | NA | NA | NA | No material |
| 2 | 1 | 9 | 0 | Si | Si | No | Microangiopatía trombótica |
| 3 | D | 6 | 0 | Si | Si | No | Membranosa |
| 4 | 1 | 0 | NA | NA | NA | NA | No material |
| 5 | 3 | 14 | 0 | Si | Si | Si | Amiloide |
| 6 | D | 4 | 1 | Si | Si | No | Membranoproliferativa |
| 7 | 2 | 0 | NA | NA | NA | NA | No material |
| 8 | 3 | 0 | NA | NA | NA | NA | No material |
| 9 | D | D | NA | Si | NA | NA | Necrosis medular focal |
| 10 | 2 | 0 | NA | Si | NA | NA | Nefritis tubulointersticial aguda |
| 11 | 2 | 6 | 0 | Si | Si | No | Membranosa |
| 12 | 6 | 2 | 1 | Si | No | NA | No material |
| 13 | 3 | 0 | NA | NA | NA | NA | No material |
| 14 | 4 | 5 | 0 | Si | Si | No | IgA |
| 15 | 2 | 8 | 0 | Si | Si | No | Nefropatía por VIH |
| 16 | 2 | 15 | 0 | Si | Si | No | Membranoproliferativa |
| 17 | 2 | 11 | 0 | Si | Si | No | Membranosa |
| 18 | D | 19 | 0 | Si | Si | No | IgA |
| 19 | 3 | 0 | 0 | NA | NA | NA | No material |
| 20 | 3 | 0 | 0 | NA | NA | NA | No material |
| 21 | 3 | 9 | 0 | Si | Si | No | Vasculitis |
| 22 | 3 | 4 | 1 | Si | Si | No | Glomerulonefritis mesangial |
| 23 | 3 | 6 | 0 | Si | Si | No | Cambios mínimos |
| 24 | 2 | 25 | 10 | Si | Si | No | Microangiopatía trombótica |
| 25 | 2 | 9 | 0 | Si | Si | No | Glomerulonefritis crioglobulinémica por VHC |
| 26 | 1 | 7 | 1 | Si | Si | No | Material insuficiente |
| 27 | 4 | 5 | 1 | Si | Si | No | Material insuficiente |
| 28 | D | 5 | 0 | Si | Si | No | IgA |
| 29 | 2 | 9 | 0 | Si | Si | No | Necrosis tubular aguda |
| 30 | 5 | 1 | 0 | Si | No | No | Material insuficiente |
| 31 | 4 | 6 | 0 | Si | Si | No | Material insuficiente |
| 32 | 4 | 4 | 1 | Si | No | No | Material insuficiente |
| 33 | 2 | 6 | 1 | Si | Si | No | Membranoproliferativa |
| 34 | 2 | 0 | NA | NA | NA | NA | No material |
| 35 | 1 | 6 | 0 | Si | Si | No | Nefritis tubulointersticial aguda |
| 36 | 1 | 17 | 5 | Si | Si | Si | Glomerulonefritis post infecciosa |
| 37 |  | 8 | 5 | Si | No | No | Nefroangioesclerosis |
| 38 | 3 | 6 | 0 | Si | Si | Si | Necrosis tubular aguda |
| 39 | 2 | 8 | 0 | Si | Si | No | IgA |
| 40 | 1 | 8 | 1 | Si | Si | No | Amiloide |
| 41 | 3 | 13 | 9 | Si | Si | No | Glomeruloesclerosis focal y segmentaria |
| 42 | 2 | 0 | NA | NA | NA | NA | No material |
| 43 | 2 | 1 | 0 | 1 | NA | No | No material |
| 44 | 2 | 11 | 0 | 11 | Si | No | Microangiopatía trombótica |
| 45 | 1 | 4 | 2 | 4 | Si | No | Glomerulonefritis crioglobulinémica por VHC |
| 46 | 2 | 16 | 1 | 6 | Si | No | Nefritis tubulointersticial aguda |
| 47 | 4 | 0 | NA | NA | NA | NA | No material |
| 48 | 2 | 2 | 0 | Si | No | No | Material insuficiente |
| 49 | 3 | 11 | 2 | Si | Si | No | Microangiopatía trombótica |
| 50 | 3 | 12 | 4 | Si | Si | No | Membranoproliferativa |
| 51 | 2 | 0 | NA | NA | NA | NA | No material |
| 52 | 2 | 9 | 0 | 9 | Si | Sí | Glomeruloesclerosis Focal y Segmentaria |
| 53 | 1 | 0 | NA | NA | NA | NA | No material |
| 54 | 7 | 5 | 0 | Si | Si | No | Membranoproliferativa |
| 55 | 4 | 12 | 1 | Si | Si | No | IgA |
| 56 | 2 | 25 | 22 | Si | Si | No | Nefroangioesclerosis |

Tabla suplementaria: Características histológicas de las biopsias transyugulares del estudio.

IF: Immunofluoresencia; ME: Microscopía electrónica; NA: No aplica; D: Desconocido
